# Supplementary material for: Mesoporous TiO2 films with regularly aligned slit-like nanovoids
Source: Royal Society of Chemistry journal article supplement (doi:10.1039/c4tc02932a), 2015-01-01
Supplement: c4tc02932a1.pdf [file c4tc02932a1.pdf]

## Electronic Supplementary Information

### Mesoporous TiO<sub>2</sub> Films with Regularly Aligned Slit-like Nanovoids

Hirokatsu Miyata,\* Yuta Fukushima, Yosuke Kanno, Saeko Hayase, Shintaro Hara, Masatoshi Watanabe, Shin Kitamura, Masahiko Takahashi and Kazuyuki Kuroda\*

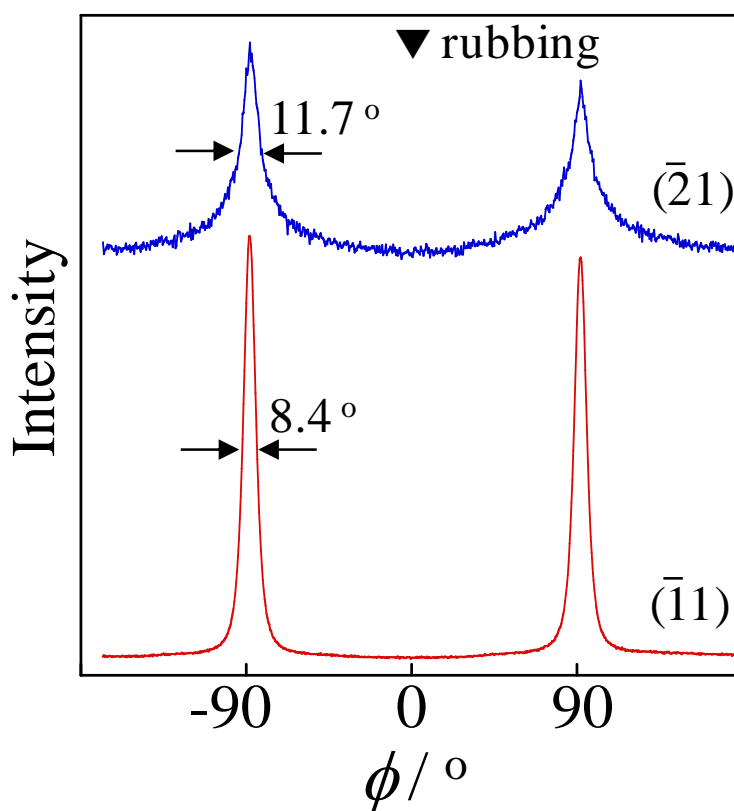

**Fig. S1.** In-plane rocking curves for  $(\bar{2}1)$  and  $(\bar{1}1)$  planes recorded for the mesostructured TiO<sub>2</sub> film before calcination.

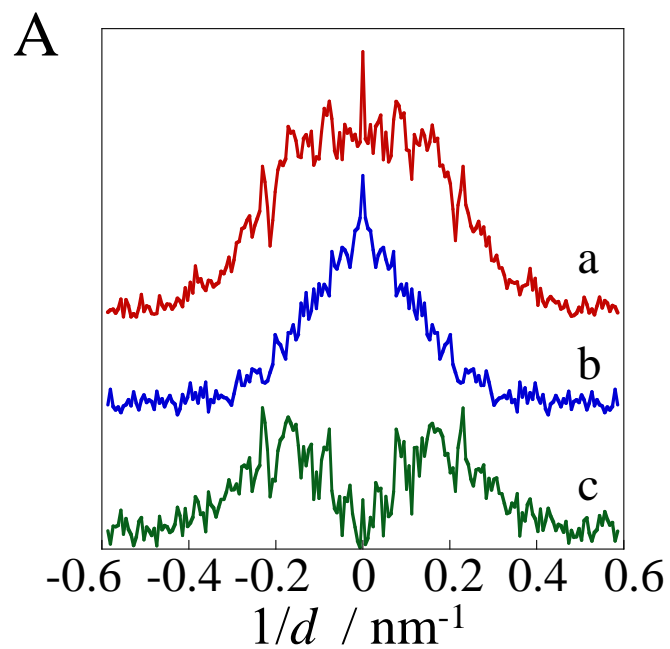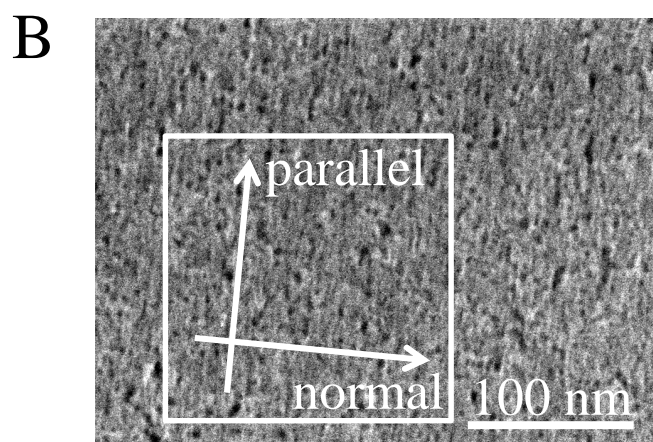

Fig. S2. (A) Line profiles of the FFT image along two directions, normal (trace a) and parallel (trace b) to the alignment direction of the mesopores, and their difference (trace c). (B) FFT is performed for the region within the white square and the two directions are shown by the arrows.

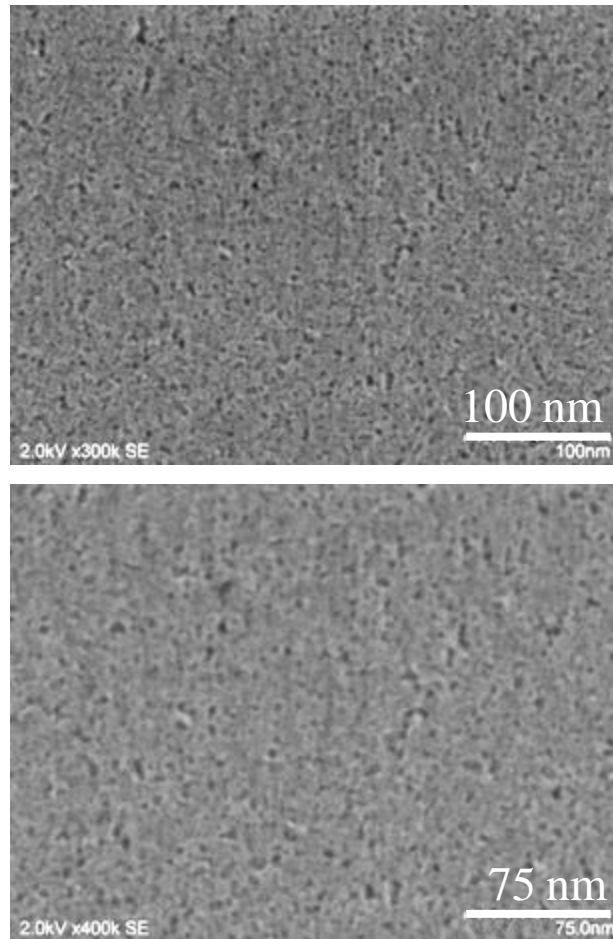

**Fig. S3.** Top view SEM images of the mesoporous TiO<sub>2</sub> film calcined at 350 °C.
